# Supplementary material for: Improving Bacterial Metagenomic Research through Long-Read Sequencing
Source: MDPI journal article supplement (doi:10.3390/microorganisms12050935), 2024-05-04
Supplement: s1 [file s1]

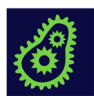

## Article

# Improving Bacterial Metagenomic Research through Long-Read Sequencing

Noah Greenman <sup>1</sup>, Sayf Al-Deen Hassouneh <sup>1</sup>, Latifa S. Abdelli <sup>2</sup>, Catherine Johnston <sup>1</sup> and Taj Azarian <sup>1,\*</sup>

## Supplementary Materials

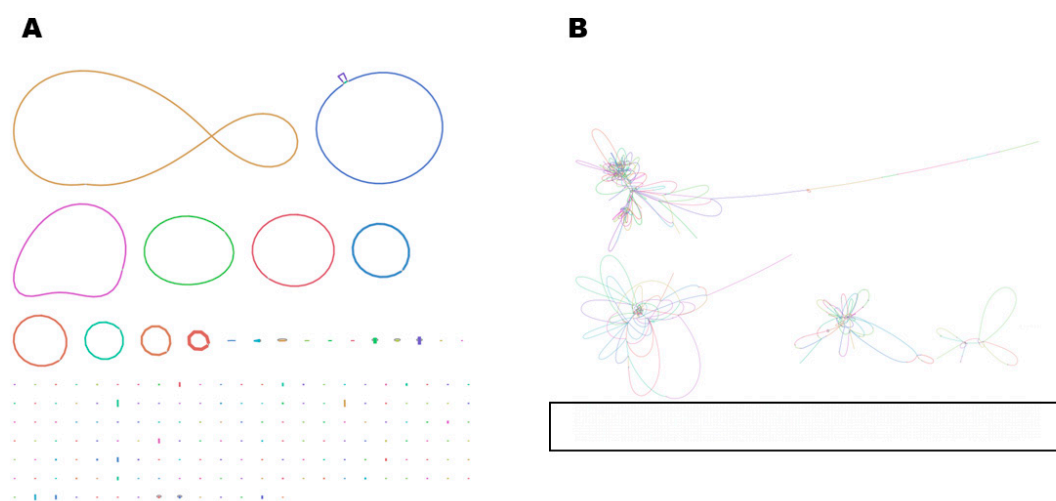

Supplemental Figure S1. Assembly graphs from a “True” 10-genome metagenome visualized by Bandage. (2A) Bandage graph generated from metagenomic assembly of long-read sequence data. (2B) Bandage graph generated from metagenomic assembly of short-read sequence data. The black box highlights small, disconnected contigs.

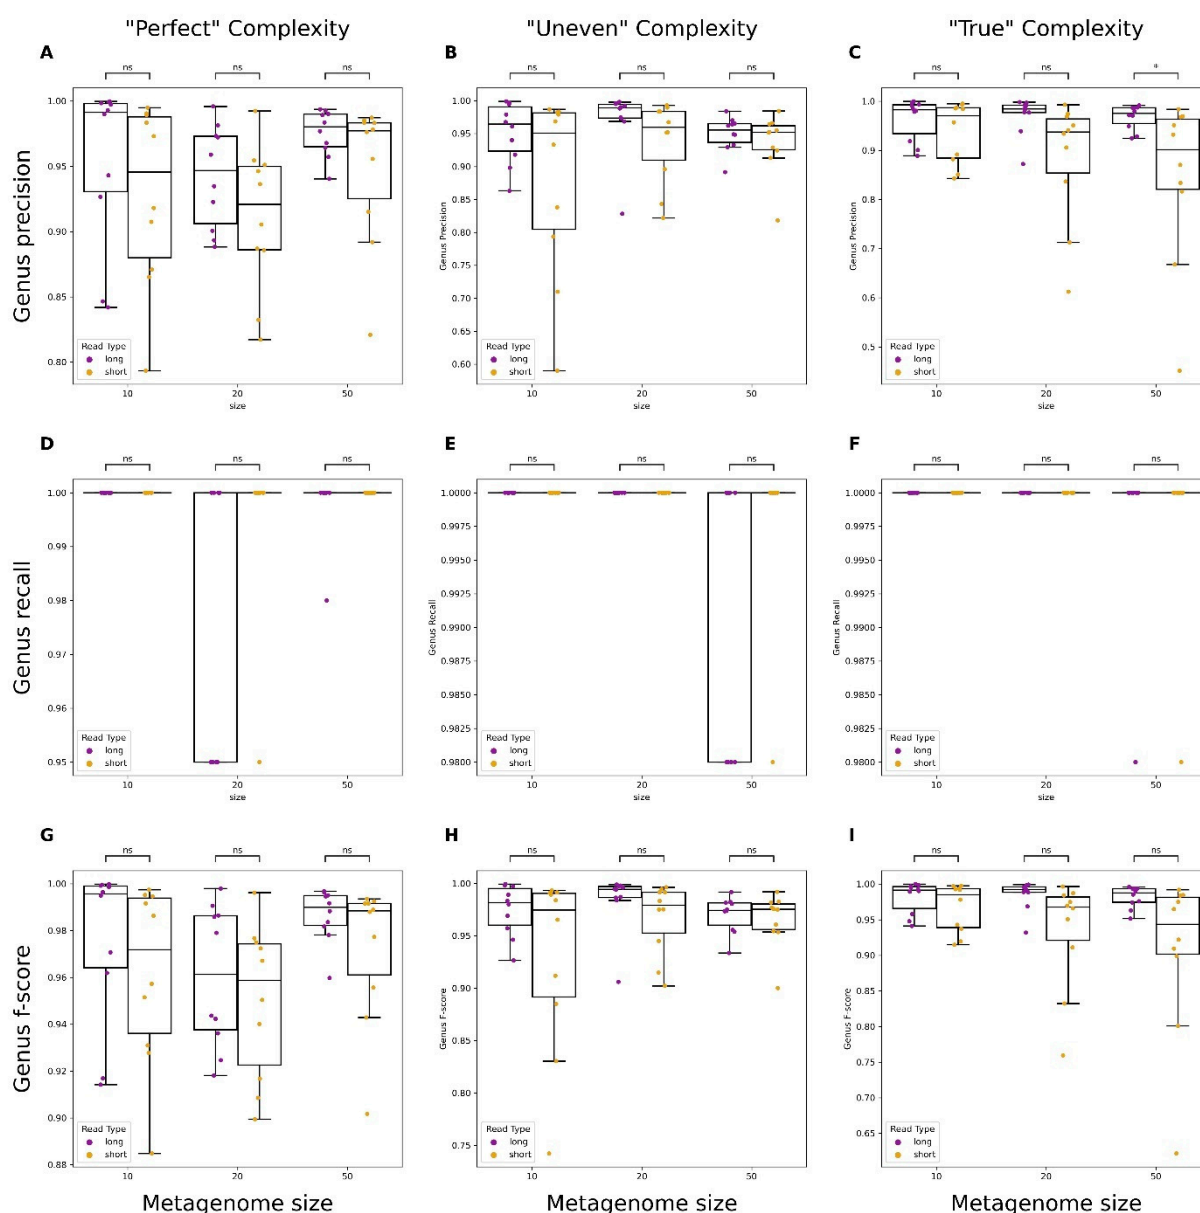

Supplemental Figure S2. Performance evaluation of genus-level classification using short and long reads. Boxplots showing precision, recall, and F-score metrics for metagenomes of varying complexity. "Perfect" simulated reads have no errors and even abundances across organisms (A, D, G), "Uneven" have no errors and randomly varied abundances across organisms (B, E, H), and "True" have simulated errors specific to each read type and varied abundances across organisms (C, F, I). Significance was calculated using a Mann-Whitney U test with Bonferroni correction. Ns: non-significant p-value ( $p > 0.05$ ; blank means  $p = 1$ ), \*:  $p \leq 0.05$ , \*\*:  $p \leq 0.01$ , \*\*\*:  $p \leq 0.001$ , \*\*\*\*:  $p \leq 0.0001$ .

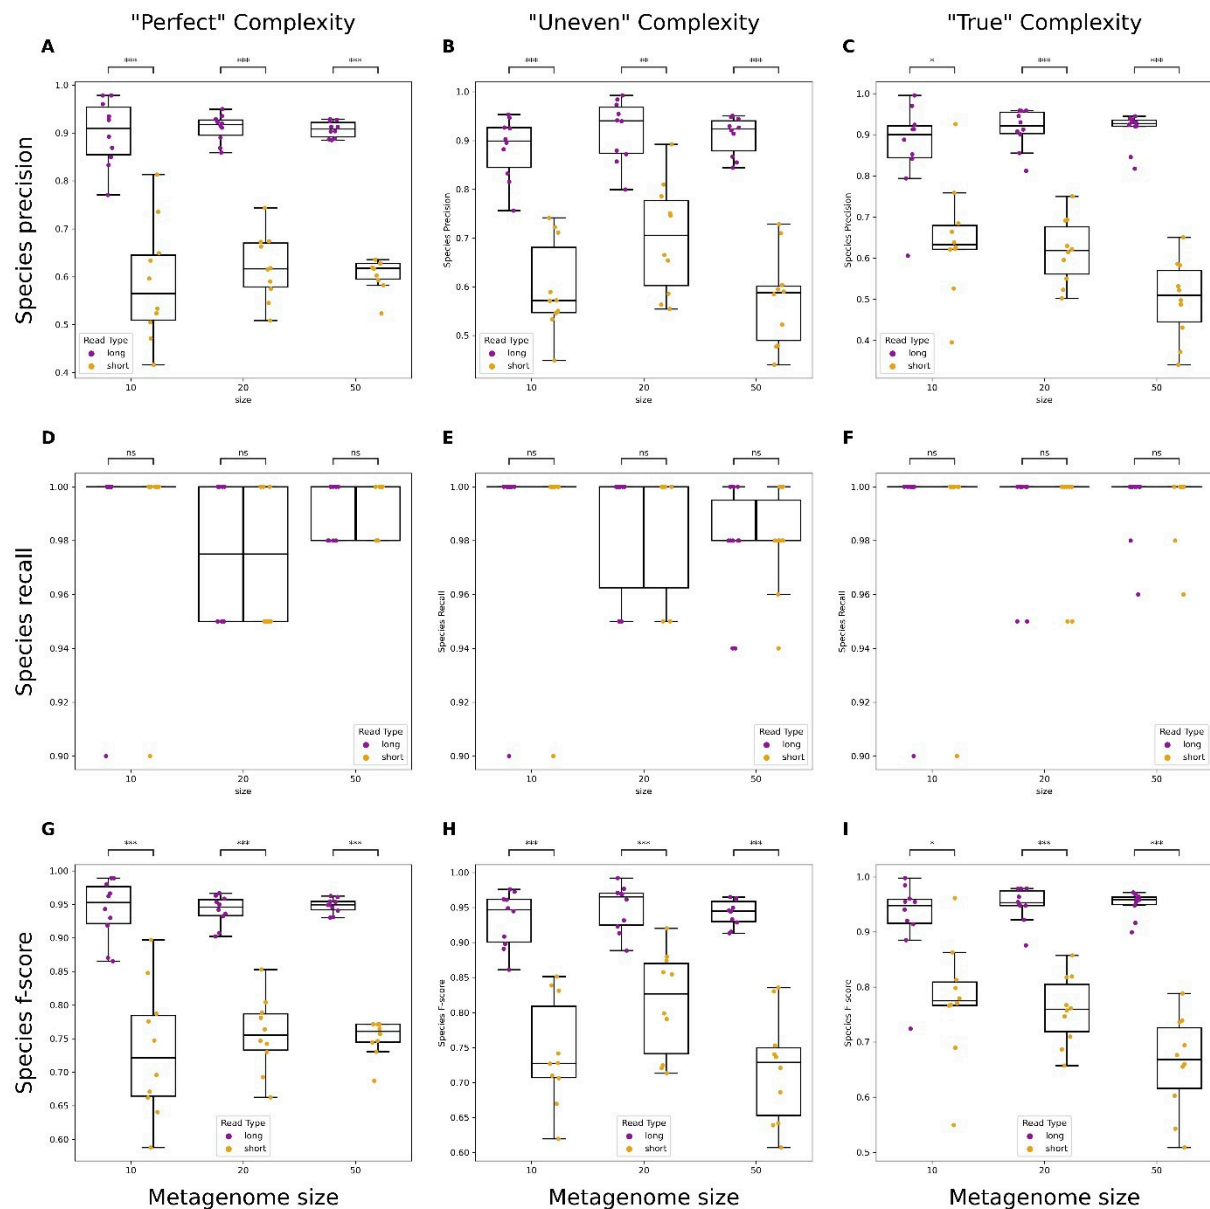

Supplemental Figure S3. Performance evaluation of species-level classification using short and long reads. Boxplots showing precision, recall, and F-score metrics for metagenomes of varying complexity. "Perfect" simulated reads have no errors and even abundances across organisms (A, D, G), "Uneven" have no errors and randomly varied abundances across organisms (B, E, H), and "True" have simulated errors specific to each read type and varied abundances across organisms (C, F, I). Significance was calculated using a Mann-Whitney U test with Bonferroni correction. Ns: non-significant p-value ( $p > 0.05$ ; blank means  $p = 1$ ), \*:  $p \leq 0.05$ , \*\*:  $p \leq 0.01$ , \*\*\*:  $p \leq 0.001$ , \*\*\*\*:  $p \leq 0.0001$ .

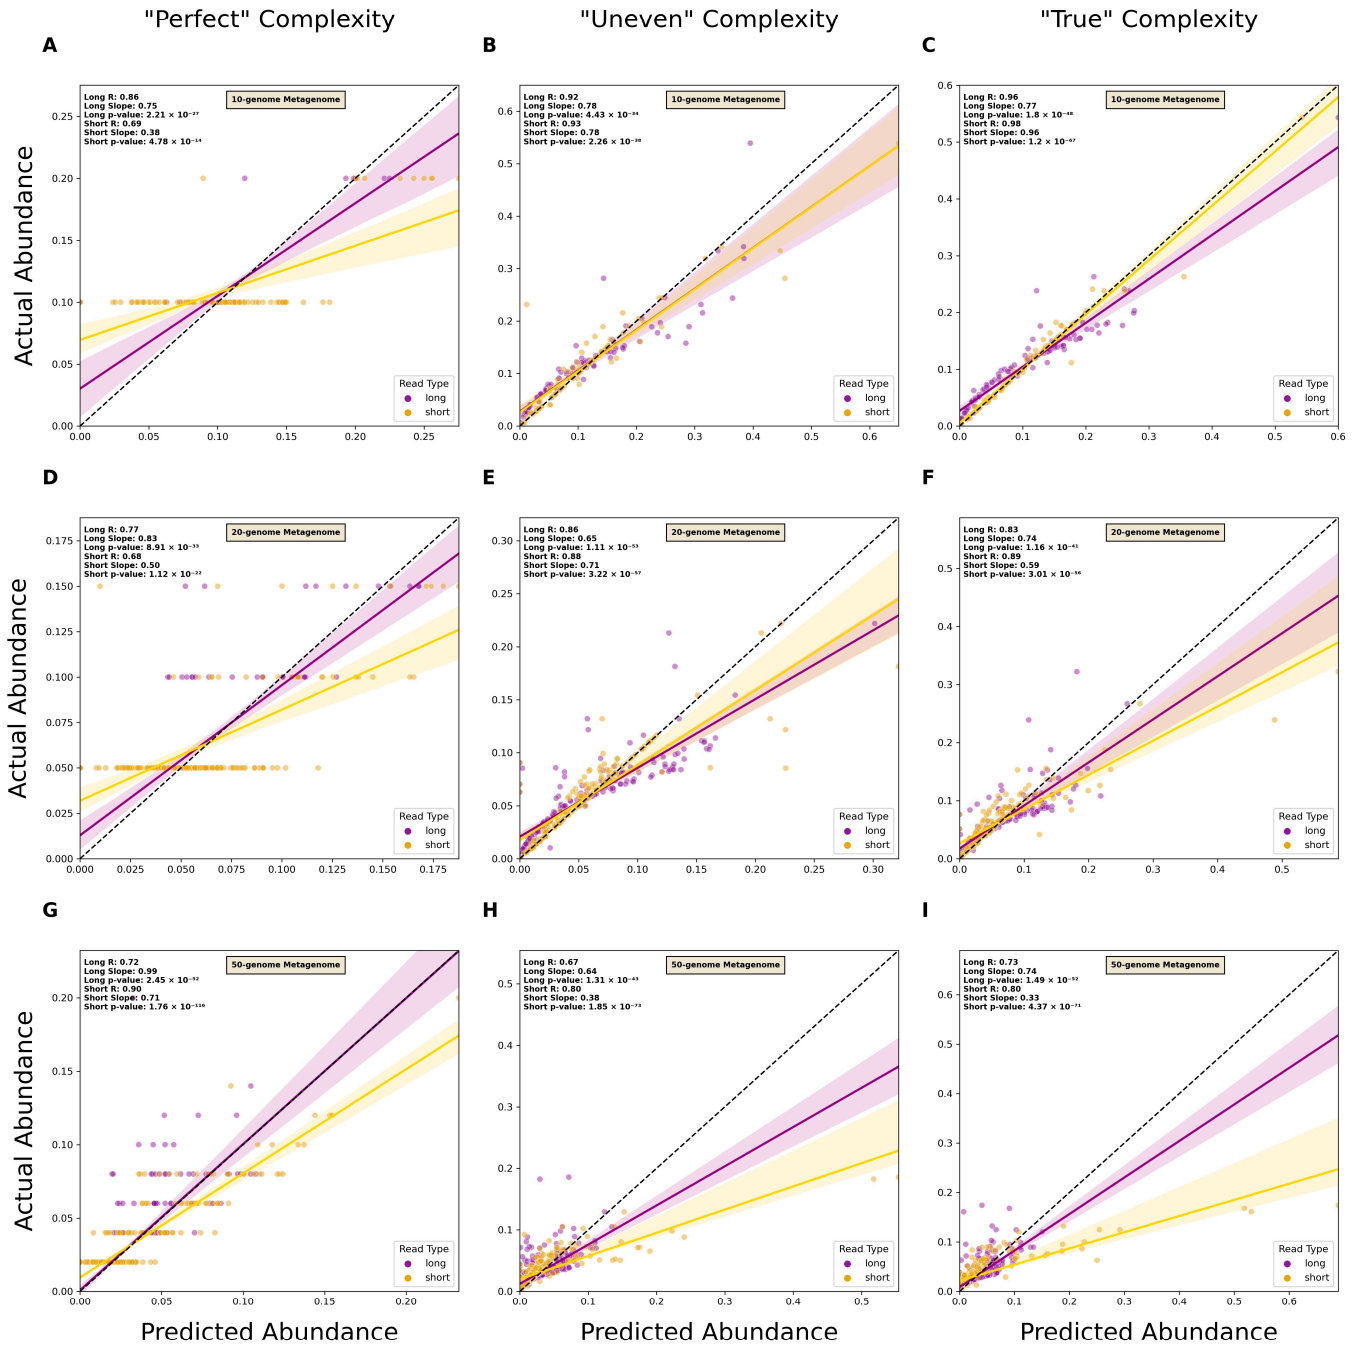

Figure S4. Comparison of short- and long-read capacity for genus-level relative abundance estimation. Scatterplots of predicted versus actual abundance values for genomes present in simulated metagenomes from short- and long-read data. Read types were compared across metagenomes of varying complexity at both the genus and species level. "Perfect" datasets consisted of reads without sequencing errors and organism abundance was evenly distributed (A, D, G), "Uneven" consisted of reads without sequencing errors and randomly distributed abundances of organisms (B, E, H), and "True" consisted of reads with simulated errors and randomly distributed abundances of organisms (C, F, I). A linear regression line was plotted for each read type. Each line has its reported R-value, slope, and p-value. The dotted line represents the 1-to-1 line where values of predicted abundance match values of actual abundance.

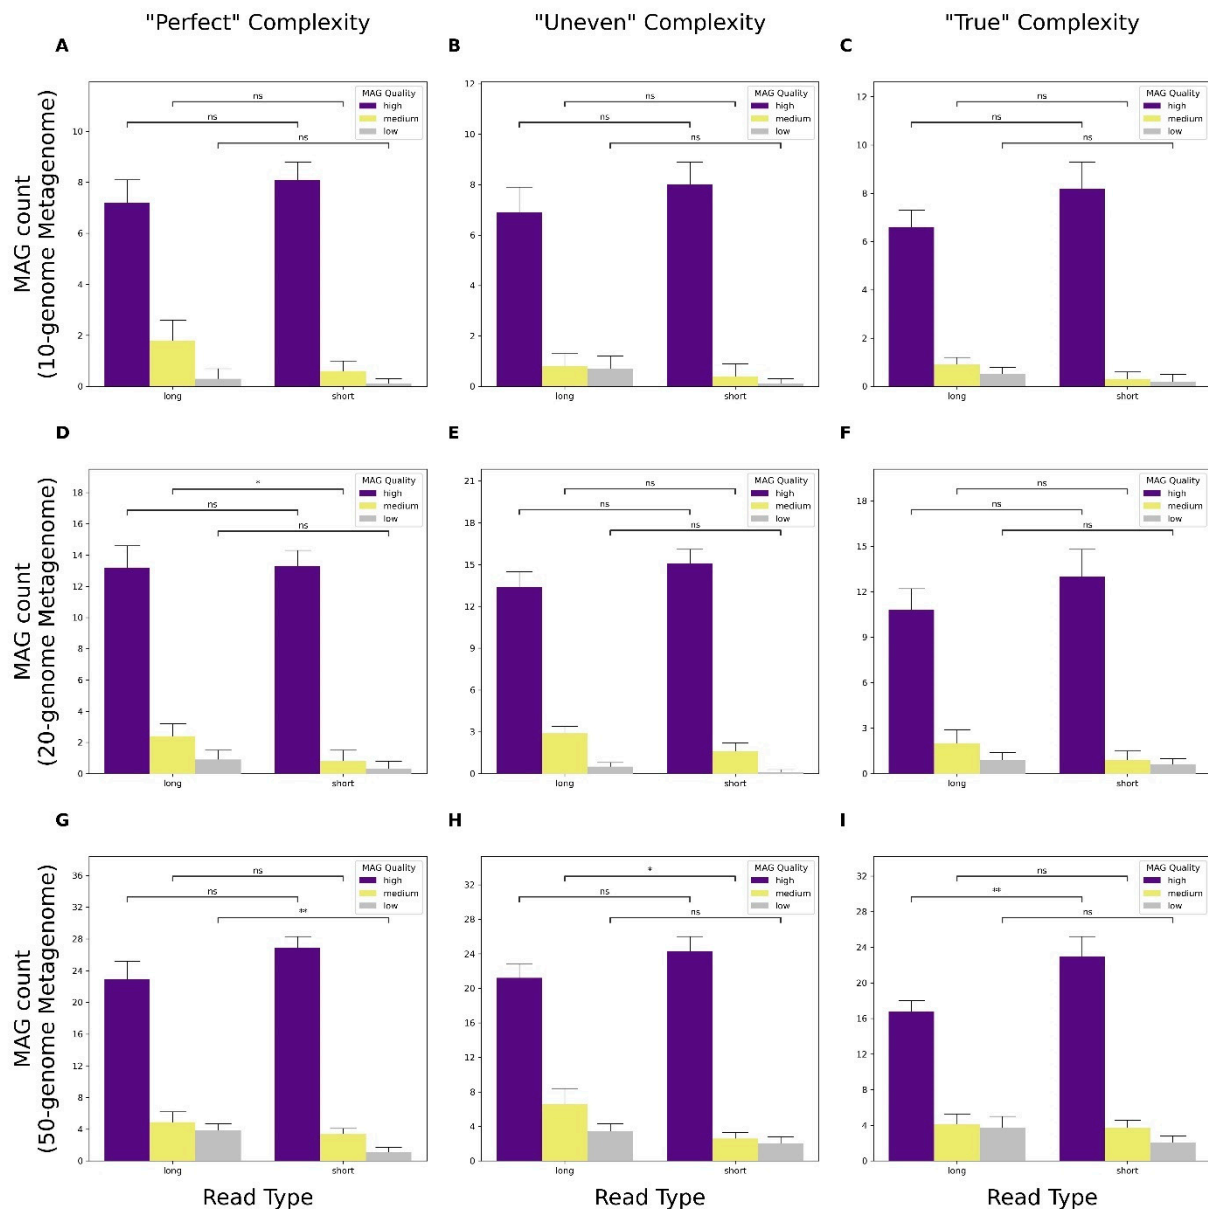

Supplemental Figure S5. Comparison of metagenome-assembled genome (MAG) counts recovered from short- and long-read assemblies by quality. Bar plots depict the total number of MAGs of a given quality recovered from both short- and long-read assemblies. “Perfect” denotes that simulated data have no errors and abundances are evenly distributed for each organism in the metagenome (S4A-C), “Uneven” have no errors, but variable abundances for each organism (S4D-F), and “True” have simulated sequencing errors based on the read type, as well as variable abundances for each organism (S4G-I). Significance was calculated using a Mann–Whitney U Test with Bonferroni correction. ns: non-significant p-value ( $p > 0.05$ ), \*:  $p \leq 0.05$ , \*\*:  $p \leq 0.01$ , \*\*\*:  $p \leq 0.001$ , \*\*\*\*:  $p \leq 0.0001$ .

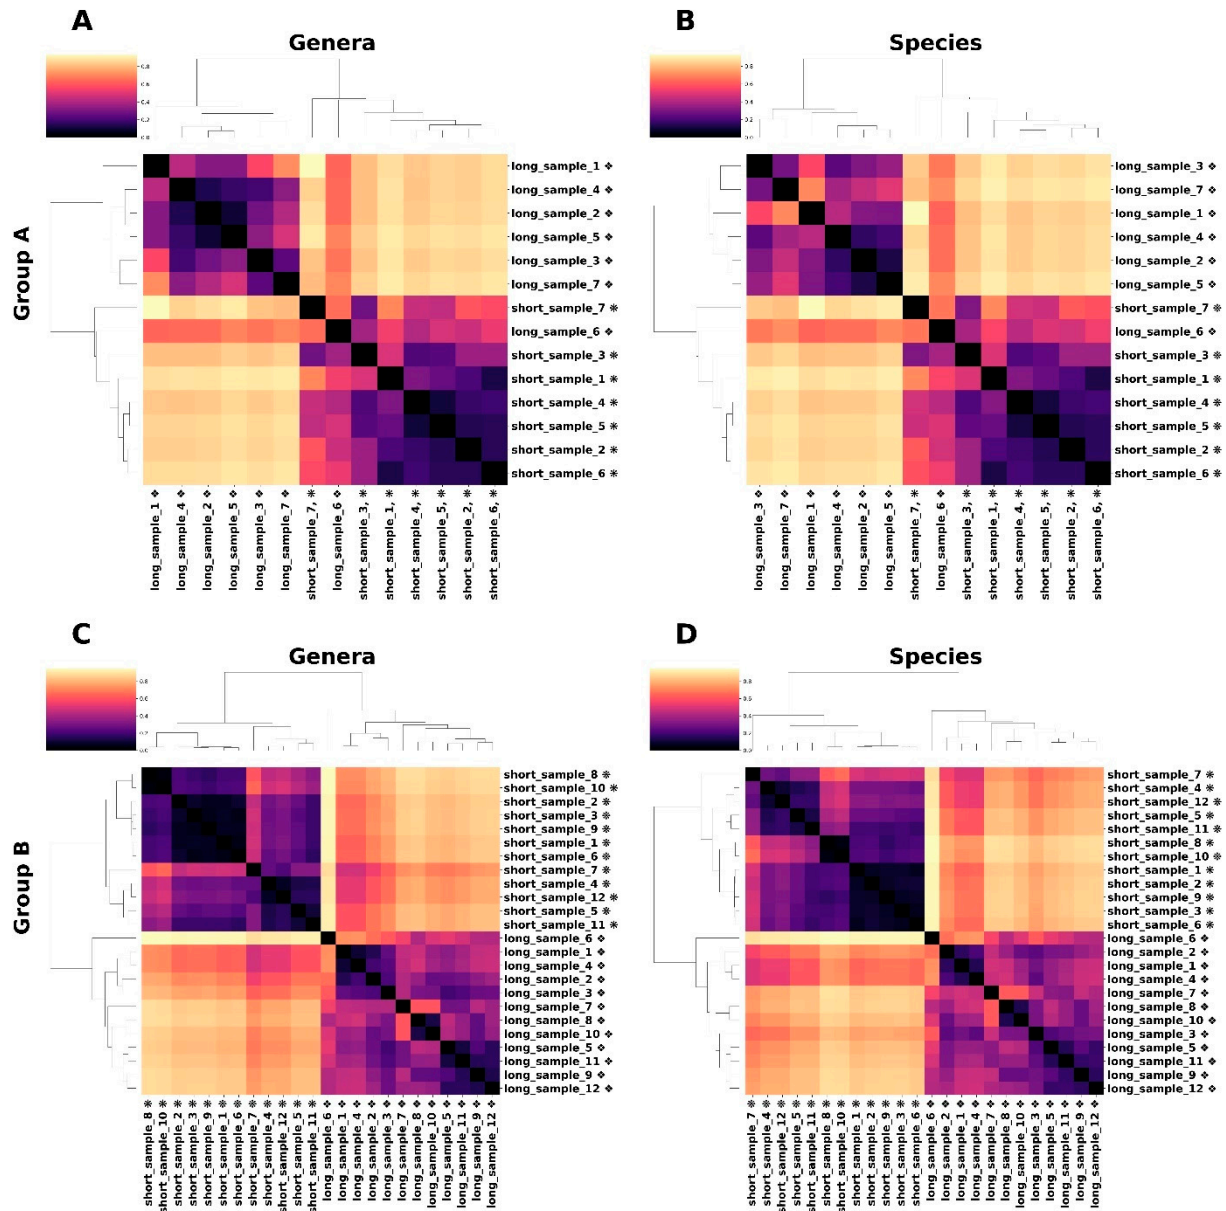

Supplemental Figure S6. Hierarchically clustered heatmap of Bray–Curtis Dissimilarity. Heatmap visualizing the dissimilarity of samples based on the read type used in beta-diversity assessment. Brighter values indicate lower similarity (or higher Bray–Curtis dissimilarity), darker values indicate higher similarity (or lower Bray–Curtis dissimilarity). ♦: Samples consist of long-read data. \*: Samples consist of short-read data.

Table S1. Results of Mann–Whitney U testing for genome fraction, NGA50, and number of misassemblies.

| simulated metagenome | complexity <sup>1</sup> | metaQUAST metric        | statistic | p-value <sup>2</sup>   |
|----------------------|-------------------------|-------------------------|-----------|------------------------|
| 10-genome metagenome | perfect                 | genome fraction         | 7600.5    | $1.79 \times 10^{-10}$ |
| 10-genome metagenome | perfect                 | NGA50                   | 8465      | $2.56 \times 10^{-17}$ |
| 10-genome metagenome | perfect                 | number of misassemblies | 6473      | $5.46 \times 10^{-8}$  |
| 20-genome metagenome | perfect                 | genome fraction         | 27671.5   | $3.04 \times 10^{-11}$ |
| 20-genome metagenome | perfect                 | NGA50                   | 30657.5   | $3.03 \times 10^{-20}$ |
| 20-genome metagenome | perfect                 | number of misassemblies | 29583.5   | $1.24 \times 10^{-26}$ |
| 50-genome metagenome | perfect                 | genome fraction         | 134024    | 0.048                  |
| 50-genome metagenome | perfect                 | NGA50                   | 156277    | $7.40 \times 10^{-12}$ |
| 50-genome metagenome | perfect                 | number of misassemblies | 194570    | $3.23 \times 10^{-67}$ |
| 10-genome metagenome | uneven                  | genome fraction         | 7433      | $2.59 \times 10^{-9}$  |
| 10-genome metagenome | uneven                  | NGA50                   | 8152      | $1.35 \times 10^{-14}$ |
| 10-genome metagenome | uneven                  | number of misassemblies | 6008      | $4.41 \times 10^{-3}$  |
| 20-genome metagenome | uneven                  | genome fraction         | 28562.5   | $1.17 \times 10^{-13}$ |
| 20-genome metagenome | uneven                  | NGA50                   | 32254     | $2.99 \times 10^{-26}$ |
| 20-genome metagenome | uneven                  | number of misassemblies | 20066     | $9.49 \times 10^{-1}$  |
| 50-genome metagenome | uneven                  | genome fraction         | 137225    | $7.42 \times 10^{-3}$  |
| 50-genome metagenome | uneven                  | NGA50                   | 169597    | $1.32 \times 10^{-22}$ |
| 50-genome metagenome | uneven                  | number of misassemblies | 133231    | $6.46 \times 10^{-2}$  |
| 10-genome metagenome | true                    | genome fraction         | 7812      | $5.66 \times 10^{-12}$ |
| 10-genome metagenome | true                    | NGA50                   | 8341      | $3.26 \times 10^{-16}$ |
| 10-genome metagenome | true                    | number of misassemblies | 5768.5    | $1.98 \times 10^{-3}$  |
| 20-genome metagenome | true                    | genome fraction         | 26882.5   | $2.51 \times 10^{-9}$  |
| 20-genome metagenome | true                    | NGA50                   | 29641.5   | $7.20 \times 10^{-17}$ |
| 20-genome metagenome | true                    | number of misassemblies | 20560     | $5.84 \times 10^{-1}$  |
| 50-genome metagenome | true                    | genome fraction         | 138988    | $2.19 \times 10^{-3}$  |
| 50-genome metagenome | true                    | NGA50                   | 170176    | $3.94 \times 10^{-23}$ |
| 50-genome metagenome | true                    | number of misassemblies | 122815    | $6.20 \times 10^{-1}$  |

<sup>1</sup> "Perfect" indicates that reads had no errors and abundances were evenly distributed. "Uneven" denotes that reads had no errors but variable abundances for each organism. "True" reads had simulated sequencing errors based on the read type and variable abundances for the organisms.

<sup>2</sup>P-value from Mann-Whitney U test with Bonferroni correction.

Table S2. Bin and metagenome-assembled genome (MAG) counts from metagenomic samples. Total bins recovered for each metagenomic sample and counts of MAGs identified from those bins. MAGs were further separated by quality as described in the methods section.



| sample <sup>1</sup> | metagenome set <sup>2</sup> | bin count (long) <sup>3a</sup> | bin count (short) <sup>3b</sup> | mag count (long) | mag count (short) | high (long) | high (short) | medium (long) | medium (short) | low (long) | low (short) |
|---------------------|-----------------------------|--------------------------------|---------------------------------|------------------|-------------------|-------------|--------------|---------------|----------------|------------|-------------|
| mock metagenome 1   | 10 genomes perfect          | 19                             | 12                              | 10               | 10                | 8           | 10           | 2             | 0              | 0          | 0           |
| mock metagenome 2   | 10 genomes perfect          | 11                             | 11                              | 9                | 9                 | 6           | 8            | 3             | 0              | 0          | 1           |
| mock metagenome 3   | 10 genomes perfect          | 10                             | 11                              | 10               | 10                | 10          | 10           | 0             | 0              | 0          | 0           |
| mock metagenome 4   | 10 genomes perfect          | 12                             | 10                              | 9                | 9                 | 7           | 7            | 1             | 2              | 1          | 0           |
| mock metagenome 5   | 10 genomes perfect          | 17                             | 10                              | 9                | 7                 | 4           | 6            | 5             | 1              | 0          | 0           |
| mock metagenome 6   | 10 genomes perfect          | 17                             | 9                               | 8                | 8                 | 7           | 8            | 1             | 0              | 0          | 0           |
| mock metagenome 7   | 10 genomes perfect          | 12                             | 10                              | 10               | 8                 | 8           | 8            | 2             | 0              | 0          | 0           |
| mock metagenome 8   | 10 genomes perfect          | 9                              | 10                              | 9                | 9                 | 8           | 8            | 1             | 1              | 0          | 0           |
| mock metagenome 9   | 10 genomes perfect          | 14                             | 11                              | 9                | 9                 | 6           | 8            | 1             | 1              | 2          | 0           |
| mock metagenome 10  | 10 genomes perfect          | 16                             | 13                              | 10               | 9                 | 8           | 8            | 2             | 1              | 0          | 0           |
| mock metagenome 1   | 10 genomes true             | 11                             | 11                              | 9                | 10                | 8           | 9            | 0             | 1              | 1          | 0           |
| mock metagenome 2   | 10 genomes true             | 11                             | 11                              | 9                | 10                | 8           | 10           | 1             | 0              | 0          | 0           |
| mock metagenome 3   | 10 genomes true             | 11                             | 8                               | 7                | 8                 | 6           | 8            | 1             | 0              | 0          | 0           |
| mock metagenome 4   | 10 genomes true             | 12                             | 12                              | 9                | 9                 | 8           | 9            | 0             | 0              | 1          | 0           |
| mock metagenome 5   | 10 genomes true             | 11                             | 8                               | 7                | 8                 | 6           | 8            | 1             | 0              | 0          | 0           |
| mock metagenome 6   | 10 genomes true             | 12                             | 12                              | 7                | 9                 | 6           | 7            | 1             | 1              | 0          | 1           |
| mock metagenome 7   | 10 genomes true             | 13                             | 10                              | 7                | 8                 | 5           | 8            | 2             | 0              | 0          | 0           |
| mock metagenome 8   | 10 genomes true             | 15                             | 10                              | 9                | 10                | 7           | 10           | 1             | 0              | 1          | 0           |
| mock metagenome 9   | 10 genomes true             | 9                              | 9                               | 7                | 5                 | 5           | 3            | 1             | 1              | 1          | 1           |
| mock metagenome 10  | 10 genomes true             | 14                             | 10                              | 9                | 10                | 7           | 10           | 1             | 0              | 1          | 0           |
| mock metagenome 1   | 10 genomes uneven           | 13                             | 10                              | 9                | 9                 | 8           | 9            | 1             | 0              | 0          | 0           |
| mock metagenome 2   | 10 genomes uneven           | 15                             | 9                               | 9                | 8                 | 6           | 7            | 2             | 1              | 1          | 0           |
| mock metagenome 3   | 10 genomes uneven           | 10                             | 11                              | 9                | 9                 | 8           | 9            | 1             | 0              | 0          | 0           |
| mock metagenome 4   | 10 genomes uneven           | 10                             | 12                              | 9                | 10                | 8           | 10           | 1             | 0              | 0          | 0           |
| mock metagenome 5   | 10 genomes uneven           | 12                             | 9                               | 8                | 7                 | 7           | 7            | 0             | 0              | 1          | 0           |
| mock metagenome 6   | 10 genomes uneven           | 16                             | 17                              | 7                | 6                 | 6           | 6            | 0             | 0              | 1          | 0           |
| mock metagenome 7   | 10 genomes uneven           | 18                             | 10                              | 7                | 9                 | 3           | 9            | 2             | 0              | 2          | 0           |
| mock metagenome 8   | 10 genomes uneven           | 15                             | 13                              | 9                | 9                 | 6           | 7            | 1             | 2              | 2          | 0           |
| mock metagenome 9   | 10 genomes uneven           | 9                              | 9                               | 7                | 8                 | 7           | 6            | 0             | 1              | 0          | 1           |
| mock metagenome 10  | 10 genomes uneven           | 10                             | 10                              | 10               | 10                | 10          | 10           | 0             | 0              | 0          | 0           |
| mock metagenome 1   | 20 genomes perfect          | 26                             | 18                              | 18               | 13                | 14          | 13           | 4             | 0              | 0          | 0           |
| mock metagenome 2   | 20 genomes perfect          | 22                             | 18                              | 17               | 15                | 14          | 14           | 0             | 1              | 3          | 0           |
| mock metagenome 3   | 20 genomes perfect          | 24                             | 19                              | 17               | 14                | 13          | 13           | 3             | 1              | 1          | 0           |
| mock metagenome 4   | 20 genomes perfect          | 19                             | 20                              | 18               | 17                | 16          | 15           | 2             | 0              | 0          | 2           |
| mock metagenome 5   | 20 genomes perfect          | 22                             | 21                              | 19               | 17                | 17          | 16           | 1             | 1              | 1          | 0           |
| mock metagenome 6   | 20 genomes perfect          | 26                             | 18                              | 14               | 13                | 10          | 12           | 2             | 1              | 2          | 0           |
| mock metagenome 7   | 20 genomes perfect          | 33                             | 32                              | 11               | 13                | 10          | 10           | 1             | 3              | 0          | 0           |
| mock metagenome 8   | 20 genomes perfect          | 22                             | 22                              | 14               | 13                | 10          | 12           | 3             | 0              | 1          | 1           |
| mock metagenome 9   | 20 genomes perfect          | 27                             | 17                              | 19               | 13                | 14          | 13           | 4             | 0              | 1          | 0           |
| mock metagenome 10  | 20 genomes perfect          | 22                             | 21                              | 18               | 16                | 14          | 15           | 4             | 1              | 0          | 0           |
| mock metagenome 1   | 20 genomes true             | 17                             | 20                              | 11               | 14                | 11          | 12           | 0             | 1              | 0          | 1           |
| mock metagenome 2   | 20 genomes true             | 24                             | 17                              | 14               | 15                | 12          | 15           | 1             | 0              | 1          | 0           |
| mock metagenome 3   | 20 genomes true             | 23                             | 23                              | 14               | 17                | 12          | 13           | 1             | 2              | 1          | 2           |
| mock metagenome 4   | 20 genomes true             | 24                             | 19                              | 16               | 18                | 12          | 15           | 3             | 2              | 1          | 1           |
| mock metagenome 5   | 20 genomes true             | 24                             | 20                              | 14               | 14                | 14          | 12           | 0             | 2              | 0          | 0           |
| mock metagenome 6   | 20 genomes true             | 26                             | 20                              | 14               | 13                | 7           | 12           | 5             | 0              | 2          | 1           |
| mock metagenome 7   | 20 genomes true             | 15                             | 21                              | 9                | 9                 | 7           | 7            | 2             | 2              | 0          | 0           |
| mock metagenome 8   | 20 genomes true             | 19                             | 21                              | 12               | 12                | 9           | 12           | 3             | 0              | 0          | 0           |
| mock metagenome 9   | 20 genomes true             | 23                             | 22                              | 14               | 14                | 10          | 13           | 2             | 0              | 2          | 1           |
| mock metagenome 10  | 20 genomes true             | 21                             | 20                              | 19               | 19                | 14          | 19           | 3             | 0              | 2          | 0           |
| mock metagenome 1   | 20 genomes uneven           | 26                             | 18                              | 18               | 16                | 14          | 16           | 3             | 0              | 1          | 0           |
| mock metagenome 2   | 20 genomes uneven           | 20                             | 18                              | 16               | 17                | 12          | 17           | 3             | 0              | 1          | 0           |
| mock metagenome 3   | 20 genomes uneven           | 23                             | 19                              | 16               | 16                | 14          | 16           | 2             | 0              | 0          | 0           |
| mock metagenome 4   | 20 genomes uneven           | 19                             | 20                              | 16               | 14                | 13          | 13           | 3             | 1              | 0          | 0           |
| mock metagenome 5   | 20 genomes uneven           | 26                             | 21                              | 19               | 19                | 15          | 17           | 3             | 2              | 1          | 0           |
| mock metagenome 6   | 20 genomes uneven           | 27                             | 23                              | 18               | 19                | 17          | 16           | 1             | 3              | 0          | 0           |
| mock metagenome 7   | 20 genomes uneven           | 23                             | 20                              | 16               | 16                | 13          | 14           | 3             | 2              | 0          | 0           |
| mock metagenome 8   | 20 genomes uneven           | 22                             | 21                              | 19               | 20                | 14          | 16           | 4             | 3              | 1          | 1           |
| mock metagenome 9   | 20 genomes uneven           | 25                             | 22                              | 15               | 16                | 10          | 13           | 4             | 3              | 1          | 0           |
| mock metagenome 10  | 20 genomes uneven           | 20                             | 19                              | 15               | 15                | 12          | 13           | 3             | 2              | 0          | 0           |
| mock metagenome 1   | 50 genomes perfect          | 57                             | 49                              | 33               | 30                | 19          | 22           | 9             | 5              | 5          | 3           |
| mock metagenome 2   | 50 genomes perfect          | 47                             | 48                              | 35               | 36                | 28          | 31           | 6             | 4              | 1          | 1           |
| mock metagenome 3   | 50 genomes perfect          | 51                             | 43                              | 32               | 32                | 22          | 28           | 5             | 3              | 5          | 1           |
| mock metagenome 4   | 50 genomes perfect          | 50                             | 50                              | 29               | 31                | 19          | 27           | 6             | 2              | 4          | 2           |
| mock metagenome 5   | 50 genomes perfect          | 56                             | 41                              | 29               | 33                | 21          | 29           | 3             | 3              | 5          | 1           |
| mock metagenome 6   | 50 genomes perfect          | 47                             | 46                              | 33               | 32                | 23          | 28           | 5             | 4              | 5          | 0           |
| mock metagenome 7   | 50 genomes perfect          | 48                             | 57                              | 33               | 30                | 24          | 27           | 4             | 2              | 5          | 1           |
| mock metagenome 8   | 50 genomes perfect          | 49                             | 44                              | 26               | 30                | 17          | 25           | 6             | 5              | 3          | 0           |
| mock metagenome 9   | 50 genomes perfect          | 44                             | 44                              | 34               | 33                | 28          | 28           | 4             | 3              | 2          | 2           |
| mock metagenome 10  | 50 genomes perfect          | 54                             | 43                              | 33               | 27                | 28          | 24           | 1             | 3              | 4          | 0           |
| mock metagenome 1   | 50 genomes true             | 52                             | 39                              | 26               | 33                | 16          | 28           | 4             | 3              | 6          | 2           |
| mock metagenome 2   | 50 genomes true             | 50                             | 38                              | 28               | 30                | 19          | 24           | 4             | 4              | 5          | 2           |
| mock metagenome 3   | 50 genomes true             | 52                             | 38                              | 25               | 29                | 18          | 23           | 3             | 5              | 4          | 1           |
| mock metagenome 4   | 50 genomes true             | 56                             | 40                              | 26               | 32                | 14          | 27           | 5             | 3              | 7          | 2           |
| mock metagenome 5   | 50 genomes true             | 50                             | 37                              | 23               | 24                | 16          | 19           | 2             | 4              | 5          | 1           |
| mock metagenome 6   | 50 genomes true             | 51                             | 42                              | 22               | 28                | 18          | 18           | 4             | 7              | 0          | 3           |
| mock metagenome 7   | 50 genomes true             | 52                             | 41                              | 24               | 31                | 18          | 26           | 3             | 1              | 3          | 4           |
| mock metagenome 8   | 50 genomes true             | 41                             | 42                              | 24               | 28                | 16          | 20           | 6             | 4              | 2          | 4           |
| mock metagenome 9   | 50 genomes true             | 39                             | 42                              | 25               | 23                | 13          | 18           | 8             | 4              | 4          | 1           |
| mock metagenome 10  | 50 genomes true             | 46                             | 35                              | 23               | 30                | 20          | 27           | 2             | 2              | 1          | 1           |
| mock metagenome 1   | 50 genomes uneven           | 49                             | 38                              | 31               | 32                | 22          | 27           | 6             | 3              | 3          | 2           |
| mock metagenome 2   | 50 genomes uneven           | 44                             | 32                              | 28               | 27                | 19          | 24           | 6             | 2              | 3          | 1           |
| mock metagenome 3   | 50 genomes uneven           | 47                             | 43                              | 33               | 28                | 20          | 21           | 8             | 4              | 5          | 3           |
| mock metagenome 4   | 50 genomes uneven           | 52                             | 37                              | 33               | 27                | 22          | 26           | 10            | 0              | 1          | 1           |
| mock metagenome 5   | 50 genomes uneven           | 39                             | 32                              | 26               | 23                | 22          | 20           | 2             | 2              | 2          | 1           |
| mock metagenome 6   | 50 genomes uneven           | 56                             | 39                              | 32               | 29                | 16          | 24           | 12            | 3              | 4          | 2           |
| mock metagenome 7   | 50 genomes uneven           | 48                             | 37                              | 31               | 28                | 23          | 22           | 5             | 4              | 3          | 2           |
| mock metagenome 8   | 50 genomes uneven           | 53                             | 39                              | 32               | 30                | 19          | 28           | 7             | 2              | 6          | 0           |
| mock metagenome 9   | 50 genomes uneven           | 48                             | 41                              | 28               | 29                | 23          | 22           | 3             | 3              | 2          | 4           |
| mock metagenome 10  | 50 genomes uneven           | 61                             | 47                              | 38               | 36                | 26          | 29           | 7             | 3              | 5          | 4           |

<sup>1</sup>Samples consist of the 10 metagenomes simulated for a given complexity. <sup>2</sup>A metagenome set is the given complexity level for a collection of simulated metagenomes. <sup>3a</sup>Sum of all bins predicted by MetaBAT2 from long-read assemblies. <sup>3b</sup>Sum of all bins predicted by MetaBAT2 from short-read assemblies.
